# Supplementary material
Source: MDPI journal article supplement (https://www.mdpi.com/2073-4344/9/11/929)
Supplement: s1 [file s1]

## Supplementary information:

### Deactivation of Cu/SSZ-13 NH<sub>3</sub>-SCR catalyst by exposure to CO, H<sub>2</sub> and C<sub>3</sub>H<sub>6</sub>.

Xavier Auvray <sup>1</sup>, Oana Mihai <sup>2</sup>, Björn Lundberg <sup>2</sup> and Louise Olsson <sup>1, \*</sup>

<sup>1</sup> Competence Centre for Catalysis (KCK), Chemical Engineering, Chalmers University of Technology, SE-412 96 Göteborg, Sweden.; [auvray@chalmers.se](mailto:auvray@chalmers.se) (X.A.); [louise.olsson@chalmers.se](mailto:louise.olsson@chalmers.se) (L.O.)

<sup>2</sup> Volvo Car Corporation, SE-405 31 Göteborg, Sweden.; [oana.mihai@volvocars.com](mailto:oana.mihai@volvocars.com) (O.M.); [bjorn.lundberg@volvocars.com](mailto:bjorn.lundberg@volvocars.com) (B.L.);

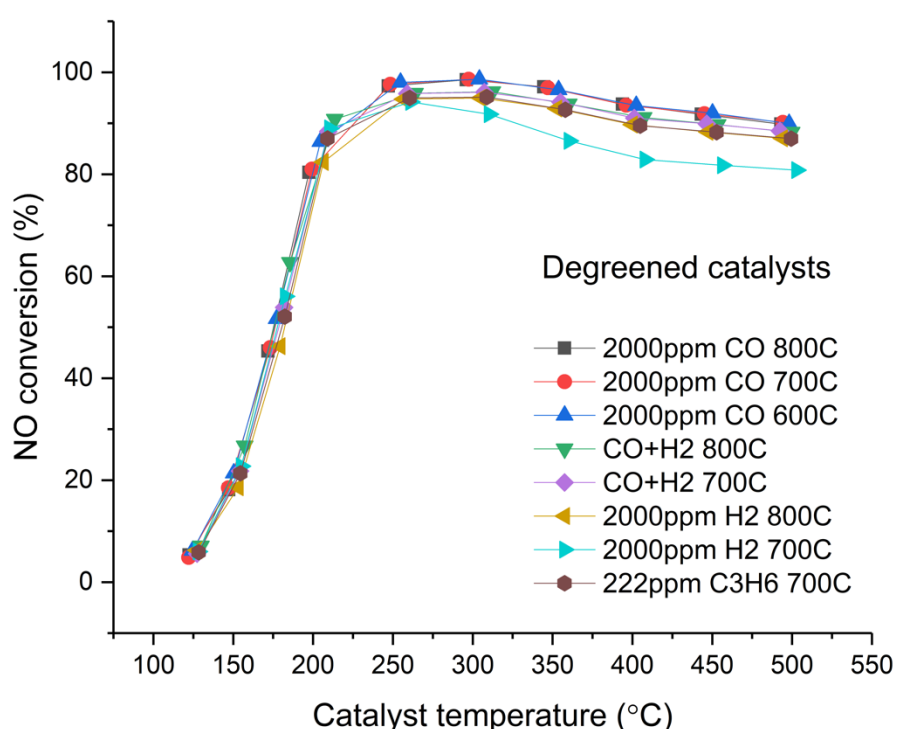

**Figure S1:** Standard SCR activity (NO conversion) of all samples after degreening, i.e. before their respective aging. Experimental conditions: 500 ppm NH<sub>3</sub>, 500 ppm NO, 8 % O<sub>2</sub>, 5 % H<sub>2</sub>O in Ar, total flow 3.5 L/min.

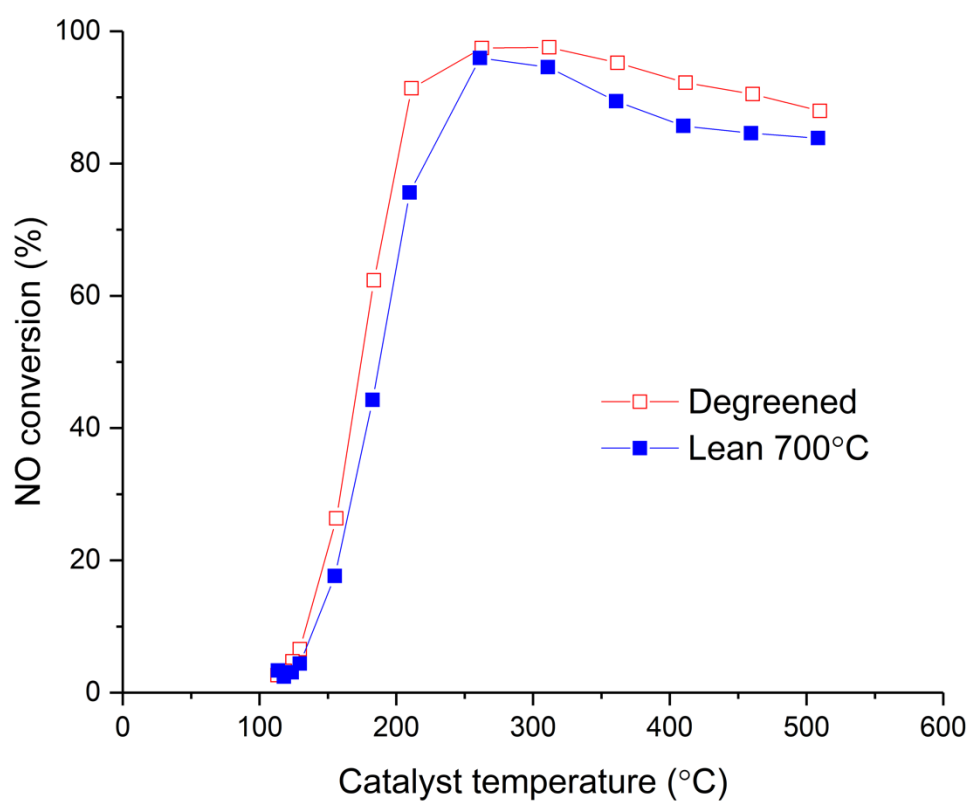

**Figure S2:** Effect of lean conditions (8% O<sub>2</sub>, 10% H<sub>2</sub>O, 10% CO<sub>2</sub>, 500ppm NO in Ar) on standard SCR activity for catalysts aged 8h at 700°C. NO conversion measured in the range 125-500°C on degreened catalyst. Experimental conditions: 500 ppm NH<sub>3</sub>, 500 ppm NO, 8 % O<sub>2</sub>, 5 % H<sub>2</sub>O in Ar, total flow 3.5 L/min.
